# Supplementary material for: Internal and External Validity of Social Media and Mobile Technology-Driven HPV Vaccination Interventions: Systematic Review Using the Reach, Effectiveness, Adoption, Implementation, Maintenance (RE-AIM) Framework
Source: MDPI journal article supplement (doi:10.3390/vaccines9030197), 2021-02-26
Supplement: s1 [file s1]

Supplementary Table 1: RE-AIM Dimensions and selected indicators reported by the reviewed articles (n =17)

| Author/year/<br>Country               | Design/<br>Outcome                                                                                                    | Reach                                                                                                                                                                                                                                                                                                                                     | Efficacy                                                                                                                                                                                                                                                                                                                                                                                         | Adoption                                                                                                                                                                                                                     | Implementation                                                                                                                                                                                                                                                                                                                                             | Maintenance                                                                       |
|---------------------------------------|-----------------------------------------------------------------------------------------------------------------------|-------------------------------------------------------------------------------------------------------------------------------------------------------------------------------------------------------------------------------------------------------------------------------------------------------------------------------------------|--------------------------------------------------------------------------------------------------------------------------------------------------------------------------------------------------------------------------------------------------------------------------------------------------------------------------------------------------------------------------------------------------|------------------------------------------------------------------------------------------------------------------------------------------------------------------------------------------------------------------------------|------------------------------------------------------------------------------------------------------------------------------------------------------------------------------------------------------------------------------------------------------------------------------------------------------------------------------------------------------------|-----------------------------------------------------------------------------------|
| <b>Chodick et al</b><br>(2020) Israel | <ul style="list-style-type: none"> <li>• Design: RCT</li> <li>• Outcome: HPV vaccine uptake</li> </ul>                | <ul style="list-style-type: none"> <li>• Target Population: Mothers with 14-year-old daughters</li> <li>• Behavior: Not described</li> <li>• Sample (n = 21,592)</li> <li>• Recruitment: No specific recruitment method was described but mothers who were members of Maccabi Healthcare Services were recruited to the study.</li> </ul> | <ul style="list-style-type: none"> <li>• Uptake: 55.3% vaccine uptake in Intervention group vs 55.0% in control.</li> <li>• Increased in vaccine uptake in Higher SES Facebook campaign group 55.8%</li> <li>• Condition: Facebook campaign group (n=17,271) vs control condition (n=4,321)</li> <li>• Assessment: Post assessment of outcome</li> <li>• Vaccinated = 9551+2377=11928</li> </ul> | <ul style="list-style-type: none"> <li>• Setting: Hospital setting (Maccabi Healthcare Services)</li> <li>• Staff: Gynecologist developed the campaign messages</li> </ul>                                                   | <ul style="list-style-type: none"> <li>• Medium: Facebook was used to deliver the content and videos</li> <li>• Theory: Inoculation theory</li> <li>• Duration: No specific time frame but participants re-view the content on Facebook and watch the video</li> <li>• Cost: Total cost of intervention not reported</li> </ul>                            | <ul style="list-style-type: none"> <li>• Institutionalization: No Data</li> </ul> |
| <b>Fontenot et al</b><br>(2020) USA   | <ul style="list-style-type: none"> <li>• Design: Pilot Intervention</li> <li>• Outcome: HPV vaccine uptake</li> </ul> | <ul style="list-style-type: none"> <li>• Target Population: MSM 18-26 years</li> <li>• Behavior: unvaccinated, not up to date, no vaccine status.</li> <li>• Sample (n = 42)</li> <li>• Participation rate: 42/54= 78%</li> <li>• Recruitment: Mobile app recruitment through MSM dating app.</li> </ul>                                  | <ul style="list-style-type: none"> <li>• Uptake: 23% vaccine uptake</li> <li>• Condition: Single group pre/post-intervention</li> <li>• Assessment: Pre/post assessment of outcome</li> <li>• Vaccinated =10</li> </ul>                                                                                                                                                                          | <ul style="list-style-type: none"> <li>• Setting: Communities in Boston, Massachusetts</li> <li>• Staff: Intervention delivery staff was not described but hospital staff involved in the data collection process</li> </ul> | <ul style="list-style-type: none"> <li>• Medium: mHealth tool</li> <li>• Theory: Implementation intention theory and design thinking</li> <li>• Duration: No specific time frame but participants re-view the mHealth tools at their own pace</li> <li>• Cost: Total cost of intervention not reported but participants received \$5 gift cards</li> </ul> | <ul style="list-style-type: none"> <li>• Institutionalization: No Data</li> </ul> |

|                                                  |                                                                                                                                      |                                                                                                                                                                                                                                                                                                           |                                                                                                                                                                                                                                                                                                                                                                                            |                                                                                                                                                                                                              |                                                                                                                                                                                                                                                                                                                                                                                                                    |                                                                                                                                                                                                                                                       |
|--------------------------------------------------|--------------------------------------------------------------------------------------------------------------------------------------|-----------------------------------------------------------------------------------------------------------------------------------------------------------------------------------------------------------------------------------------------------------------------------------------------------------|--------------------------------------------------------------------------------------------------------------------------------------------------------------------------------------------------------------------------------------------------------------------------------------------------------------------------------------------------------------------------------------------|--------------------------------------------------------------------------------------------------------------------------------------------------------------------------------------------------------------|--------------------------------------------------------------------------------------------------------------------------------------------------------------------------------------------------------------------------------------------------------------------------------------------------------------------------------------------------------------------------------------------------------------------|-------------------------------------------------------------------------------------------------------------------------------------------------------------------------------------------------------------------------------------------------------|
|                                                  |                                                                                                                                      |                                                                                                                                                                                                                                                                                                           |                                                                                                                                                                                                                                                                                                                                                                                            |                                                                                                                                                                                                              | plus a chance to win \$75 gift card                                                                                                                                                                                                                                                                                                                                                                                |                                                                                                                                                                                                                                                       |
| <b>Gerend &amp; Madkins et al.</b><br>(2020) USA | <ul style="list-style-type: none"> <li>• Design: RCT</li> <li>• Outcome: HPV vaccine uptake</li> </ul>                               | <ul style="list-style-type: none"> <li>• Target Population: Young Sexual Minority Men 18 -25</li> <li>• Behavior: Unvaccinated</li> <li>• Sample (n = 150)</li> <li>• Participation rate: (150/155) 96.77%</li> <li>• Recruitment: Recruited participants using social media and advertisement</li> </ul> | <ul style="list-style-type: none"> <li>• Uptake: Vaccination initiation higher among the intervention group (19.4%) vs. control group (6.6%)</li> <li>• Condition: RCT: Intervention group (n=72) vs. control group (n=76)</li> <li>• Assessment: Assessed vaccination status at baseline, 3-week follow-up and 9-month follow-up assessments.</li> <li>• Vaccinated =14+5 = 19</li> </ul> | <ul style="list-style-type: none"> <li>• Setting: No specific setting but participants were recruited from Chicago areas.</li> <li>• Staff: No intervention delivery staff description</li> </ul>            | <ul style="list-style-type: none"> <li>• Medium: Used text messages to deliver intervention messages.</li> <li>• Theory: Information-Motivation-Behavioral Skills (IMB) model framework</li> <li>• Duration: Intervention duration or contact was daily for the first 3 weeks and changed to 1 per month for 8 months.</li> <li>• Cost: Total cost not reported but each participant could receive \$75</li> </ul> | <ul style="list-style-type: none"> <li>• Institutionalization: No Data</li> <li>• However, 9-month follow-up was conducted</li> <li>• Attrition rate: between 4% -7% attrition rate at 3 weeks follow up and 9% -12% at 9 months follow-up</li> </ul> |
| <b>Gerend et.al</b><br>(2020) USA                | <ul style="list-style-type: none"> <li>• Design: Not stated</li> <li>• Outcome: Increase in overall HPV vaccination rates</li> </ul> | <ul style="list-style-type: none"> <li>• Target Population: Male and female students</li> <li>• Sample (n = 799)</li> <li>• Behavior: had not yet completed the HPV vaccine series</li> <li>• Recruitment: No specific recruitment strategy described.</li> </ul>                                         | <ul style="list-style-type: none"> <li>• Observed a 75% increase in HPV doses.</li> <li>• Observed a trend that more HPV vaccine doses were administered to students older than 26 years of age in 2019 vs 2018</li> <li>• Intervention condition was not described but it was a single group intervention</li> <li>• Baseline assessment and post intervention assessment</li> </ul>      | <ul style="list-style-type: none"> <li>• Setting: University campus</li> <li>• Staff: UHS staff consisted of physicians, physician assistants, and nurse practitioners delivered the intervention</li> </ul> | <ul style="list-style-type: none"> <li>• Medium: Weekly social media postings (Not mention specific social media)</li> <li>• Theory: No Theory</li> <li>• Duration: Multi-intervention components which had 30-minute PowerPoint presentation</li> <li>• Intervention has 2 components: (1) student direction</li> </ul>                                                                                           | Institutionalization: No Data                                                                                                                                                                                                                         |

Note: RCT = Randomized Controlled Trial; MSM = Men having sex with men;

|                                   |                                                                                                                              |                                                                                                                                                                                                                                                                                                                                                                                                         |                                                                                                                                                                                                                                                                                                                                                                                                                                 |                                                                                                                                                                                         |                                                                                                                                                                                                                                                                                                                                                                                                                   |                                                                                                                                                                                                                   |
|-----------------------------------|------------------------------------------------------------------------------------------------------------------------------|---------------------------------------------------------------------------------------------------------------------------------------------------------------------------------------------------------------------------------------------------------------------------------------------------------------------------------------------------------------------------------------------------------|---------------------------------------------------------------------------------------------------------------------------------------------------------------------------------------------------------------------------------------------------------------------------------------------------------------------------------------------------------------------------------------------------------------------------------|-----------------------------------------------------------------------------------------------------------------------------------------------------------------------------------------|-------------------------------------------------------------------------------------------------------------------------------------------------------------------------------------------------------------------------------------------------------------------------------------------------------------------------------------------------------------------------------------------------------------------|-------------------------------------------------------------------------------------------------------------------------------------------------------------------------------------------------------------------|
|                                   |                                                                                                                              |                                                                                                                                                                                                                                                                                                                                                                                                         | <ul style="list-style-type: none"> <li>• Vaccinated =599</li> </ul>                                                                                                                                                                                                                                                                                                                                                             |                                                                                                                                                                                         | <p>campaign materials (2) provider directed training and HPV vaccination encouragement</p> <ul style="list-style-type: none"> <li>• Intervention was limited to the first three months of the Spring semester</li> <li>• Cost: No data</li> </ul>                                                                                                                                                                 |                                                                                                                                                                                                                   |
| <b>Kempe et al.</b><br>(2016) USA | <ul style="list-style-type: none"> <li>• Design: RCT</li> <li>• Outcome: Increase HPV vaccine completion series</li> </ul>   | <ul style="list-style-type: none"> <li>• Target Population: Parents of eligible adolescents receiving their first HPV vaccine</li> <li>• Adolescents (males and females) ages 11-17; PCO members for past 2 years<br/>Sample (n = 929)</li> <li>• Behavior: Already received 1st dose</li> <li>• Recruitment: Active enrollment with intervention group, passive enrollment in control group</li> </ul> | <ul style="list-style-type: none"> <li>• Uptake: Significant increased vaccination completion rate among intervention group compared to control group (63% vs 38% respectively)</li> <li>• Intent-to-treat analysis</li> <li>• Condition: RCT: cluster, randomized pragmatic trial (intervention n=374 or control group n=555)</li> <li>• Assessments: Two follow-up assessments</li> <li>• Vaccinated = 236+211=447</li> </ul> | <ul style="list-style-type: none"> <li>• Setting: KPCO Clinic</li> <li>• Staff: Clinic staff including pediatric, nurses, medical assistants who helped in enrollment phase.</li> </ul> | <ul style="list-style-type: none"> <li>• Medium: Used text messages, email, or auto-dial:</li> <li>• Theory: No theory</li> <li>• Duration: Not specific but KPCO used an Interactive Voice Response (IVR) system, which is capable of producing multiple automated recall messages parents selected reminder recall method</li> <li>• Recalls issued for each remaining dose</li> <li>• Cost: No data</li> </ul> | <ul style="list-style-type: none"> <li>• Institutionalization was part of the long-term plan of the researchers.</li> <li>• Series completion rates were measured 1 year after HPV dose 1 was received</li> </ul> |
| <b>Kim et.al</b><br>(2020) USA    | <ul style="list-style-type: none"> <li>• Design: RCT</li> <li>• Outcome: measure increase/change in initiation of</li> </ul> | <ul style="list-style-type: none"> <li>• Target population: Korean undergraduate and graduate female students living in the USA</li> <li>• Behavior: Had not yet received HPV vaccination</li> </ul>                                                                                                                                                                                                    | <ul style="list-style-type: none"> <li>• Vaccine uptake: Intervention group was twice as likely to receive HPV vaccine dose compared to control group.</li> <li>• Other impact: Both condition increased knowledge.</li> </ul>                                                                                                                                                                                                  | <ul style="list-style-type: none"> <li>• Setting: Colleges, churches, social media.</li> <li>• Staff: 3 peers paired of Korean American college women and</li> </ul>                    | <ul style="list-style-type: none"> <li>• Medium: Mobile web technology to deliver storytelling HPV video and emails.</li> <li>• Theory: Situation specific theoretical framework along</li> </ul>                                                                                                                                                                                                                 | <ul style="list-style-type: none"> <li>• Institutionalization: No Data</li> </ul>                                                                                                                                 |

|                                   |                                                                                                                                                    |                                                                                                                                                                                                                                                                                                        |                                                                                                                                                                                                                                                                                                                                                                    |                                                                                                                                                                                                                     |                                                                                                                                                                                                                                                                                      |                                                                                                         |
|-----------------------------------|----------------------------------------------------------------------------------------------------------------------------------------------------|--------------------------------------------------------------------------------------------------------------------------------------------------------------------------------------------------------------------------------------------------------------------------------------------------------|--------------------------------------------------------------------------------------------------------------------------------------------------------------------------------------------------------------------------------------------------------------------------------------------------------------------------------------------------------------------|---------------------------------------------------------------------------------------------------------------------------------------------------------------------------------------------------------------------|--------------------------------------------------------------------------------------------------------------------------------------------------------------------------------------------------------------------------------------------------------------------------------------|---------------------------------------------------------------------------------------------------------|
|                                   | HPV vaccination                                                                                                                                    | <ul style="list-style-type: none"> <li>• Sample size: (n=104)</li> <li>• Recruitment: Use student leaders, pastors and social media to recruit participants</li> <li>• Loss to follow up: Intervention group (n=9); control (n=8)</li> </ul>                                                           | <ul style="list-style-type: none"> <li>• Condition: intervention (n=54) and control group (n=50)</li> <li>• Assessments: Two short-term assessment (post intervention and 2-month follow-up)</li> <li>• Vaccinated = 10</li> </ul>                                                                                                                                 | Physicians address common misconceptions                                                                                                                                                                            | <ul style="list-style-type: none"> <li>with storytelling and communication theory</li> <li>• Duration: Not specific.</li> <li>• Cost: Total cost not reported. However, each participant received \$20 gift certificate and had chance to win additional \$100 gift card</li> </ul>  |                                                                                                         |
| <b>Lee et al.</b><br>(2016) USA   | <ul style="list-style-type: none"> <li>• Design: Pilot efficacy</li> <li>• Outcome: Increase receipt of HPV vaccine</li> </ul>                     | <ul style="list-style-type: none"> <li>• Target Population: Korean American women ages 21-29</li> <li>• Behavior: No prior receipt of HPV vaccine</li> <li>• Sample (n = 30)</li> <li>• Recruitment: Multi-recruitment methods including brochures, flyers, advertisement on social media.</li> </ul>  | <ul style="list-style-type: none"> <li>• Vaccine uptake: 30% received first dose of vaccine.</li> <li>• Other impact: Increase in knowledge and intent for the vaccine.</li> <li>• Condition: Single pre/post quasi-experimental design</li> <li>• Assessments: Baseline and post-intervention assessment (one week)</li> <li>• Vaccinated = 9</li> </ul>          | <ul style="list-style-type: none"> <li>• Setting: No one specific setting. Recruited participants from churches, clinic and other community settings</li> <li>• Staff: Delivery staff was not described.</li> </ul> | <ul style="list-style-type: none"> <li>• Medium: Used text message, mobile phone intervention</li> <li>• Theory: Fogg Behavioral and Trans-theoretical Models</li> <li>• Duration: Messages delivered for 20-30 minutes each day for 7 days</li> <li>• Cost: Not reported</li> </ul> | <ul style="list-style-type: none"> <li>• Institutionalization: No Data</li> </ul>                       |
| <b>Matheson et al.</b> (2014) USA | <ul style="list-style-type: none"> <li>• Design: Not stated</li> <li>• Outcome: measure increase in HPV vaccine series completion rates</li> </ul> | <ul style="list-style-type: none"> <li>• Target Population: Adolescent and young adult between 11 – 22 years.</li> <li>• Behavior: Patients and parent hospital visits and family initiated the vaccine.</li> <li>• Sample: (n=312)</li> <li>• Recruitment: Recruited during hospital visit</li> </ul> | <ul style="list-style-type: none"> <li>• Vaccine uptake: 14% in intervention group completed the vaccine series compared to 0% in interested group and 3% in standard care group</li> <li>• Other impact: Increased in second doses.</li> <li>• Condition: Not RCT: Three aims (Intervention group n=37, interested group n=43 and standard care n=232)</li> </ul> | <ul style="list-style-type: none"> <li>• Setting: Pediatric clinic</li> <li>• Staff: Health care providers</li> </ul>                                                                                               | <ul style="list-style-type: none"> <li>• Medium: Third party Web-based reminder system delivered text message reminders</li> <li>• Theory: No theory</li> <li>• Duration: Three different text messages at different times</li> <li>• Cost: Not reported</li> </ul>                  | <ul style="list-style-type: none"> <li>• Institutionalization: Conducted long term follow-up</li> </ul> |

|                                     |                                                                                                                                      |                                                                                                                                                                                                                                                                                                          |                                                                                                                                                                                                                                                                                                                                                             |                                                                                                                                                                                                                 |                                                                                                                                                                                                                                                                                                                                 |                                                                                           |
|-------------------------------------|--------------------------------------------------------------------------------------------------------------------------------------|----------------------------------------------------------------------------------------------------------------------------------------------------------------------------------------------------------------------------------------------------------------------------------------------------------|-------------------------------------------------------------------------------------------------------------------------------------------------------------------------------------------------------------------------------------------------------------------------------------------------------------------------------------------------------------|-----------------------------------------------------------------------------------------------------------------------------------------------------------------------------------------------------------------|---------------------------------------------------------------------------------------------------------------------------------------------------------------------------------------------------------------------------------------------------------------------------------------------------------------------------------|-------------------------------------------------------------------------------------------|
|                                     |                                                                                                                                      |                                                                                                                                                                                                                                                                                                          | <ul style="list-style-type: none"> <li>Assessments: two post intervention assessment for 2 dose and 3 doses.</li> <li>Vaccinated =5+7=12</li> </ul>                                                                                                                                                                                                         |                                                                                                                                                                                                                 |                                                                                                                                                                                                                                                                                                                                 |                                                                                           |
| <b>Mohanty et al.</b><br>(2018) USA | <ul style="list-style-type: none"> <li>Design: Population-based</li> <li>Outcome: measure increases in HPV vaccine uptake</li> </ul> | <ul style="list-style-type: none"> <li>Target Population: Male and female adolescents ages 13-18</li> <li>Behavior: Under-vaccinated population</li> <li>Sample: (n=155,110)</li> <li>Recruitment: Facebook campaign was used to recruit participants</li> </ul>                                         | <ul style="list-style-type: none"> <li>Vaccine uptake: 152 adolescents received vaccinations</li> <li>Other impact: 63 participants completed 3 doses</li> <li>Condition: No specific comparison group.</li> <li>Assessments. Assessed participants activities through Facebook matrix and the hospital verifications.</li> <li>Vaccinated = 215</li> </ul> | <ul style="list-style-type: none"> <li>Setting: No specific setting but participants were recruited from Philadelphia areas.</li> <li>Staff: Staff from the Philadelphia Department of Public Health</li> </ul> | <ul style="list-style-type: none"> <li>Medium: Facebook and webpage were used to deliver the intervention</li> <li>Theory: Health Belief Model</li> <li>Duration: Campaign was run for two weeks period.</li> <li>Cost: Described the campaign cost (\$3,000 per advertising campaign but did not report total cost.</li> </ul> | <ul style="list-style-type: none"> <li>Institutionalization: No data reported.</li> </ul> |
| <b>Ortiz et al.</b><br>(2018) USA   | <ul style="list-style-type: none"> <li>Design: Not stated</li> <li>Outcome: measure HPV vaccine completion/uptake</li> </ul>         | <ul style="list-style-type: none"> <li>Target Population: Adolescents 13-18 years</li> <li>Behavior: Not yet initiated or completed HPV vaccine series</li> <li>Sample: (n= 108)</li> <li>Recruitment: Posters and fliers were used to recruit participants from community center and clinic.</li> </ul> | <ul style="list-style-type: none"> <li>Vaccine uptake: No significant increase in HPV vaccination</li> <li>Other impact:</li> <li>Condition: Intervention group (n=82) and control group (n =26)</li> <li>Assessments: Baseline and three months post intervention assessments.</li> <li>Vaccinated. Not available</li> </ul>                               | <ul style="list-style-type: none"> <li>Setting: Took place in 2 Southeastern US cities</li> <li>Staff: No data available</li> </ul>                                                                             | <ul style="list-style-type: none"> <li>Medium: Facebook was used to deliver the intervention.</li> <li>Theory: Health Belief Model</li> <li>Duration: During 3-month time period totaling 24 health facts</li> <li>Cost: Total cost not reported. However, each participant received \$25 gift card.</li> </ul>                 | <ul style="list-style-type: none"> <li>Institutionalization: No data reported.</li> </ul> |

|                                                 |                                                                                                                                              |                                                                                                                                                                                                                                                                                                                                                                 |                                                                                                                                                                                                                                                                                                                                                                                                                                                                                                                                                                          |                                                                                                                                                                                                                                                                                                            |                                                                                                                                                                                                                                                                                                                                                                         |                                                                                                                                                                               |
|-------------------------------------------------|----------------------------------------------------------------------------------------------------------------------------------------------|-----------------------------------------------------------------------------------------------------------------------------------------------------------------------------------------------------------------------------------------------------------------------------------------------------------------------------------------------------------------|--------------------------------------------------------------------------------------------------------------------------------------------------------------------------------------------------------------------------------------------------------------------------------------------------------------------------------------------------------------------------------------------------------------------------------------------------------------------------------------------------------------------------------------------------------------------------|------------------------------------------------------------------------------------------------------------------------------------------------------------------------------------------------------------------------------------------------------------------------------------------------------------|-------------------------------------------------------------------------------------------------------------------------------------------------------------------------------------------------------------------------------------------------------------------------------------------------------------------------------------------------------------------------|-------------------------------------------------------------------------------------------------------------------------------------------------------------------------------|
| <b>Patel et al.</b><br>(2014) USA               | <ul style="list-style-type: none"> <li>• Design: RCT</li> <li>• Outcome: HPV vaccine uptake and completion</li> </ul>                        | <ul style="list-style-type: none"> <li>• Target Population: Women between ages 19-26</li> <li>• Behavior: Received first dose of vaccine.</li> <li>• Sample: (n=365)</li> <li>• Recruitment: Participants were recruited during the hospital visit</li> <li>• Inclusion and exclusion: Sufficiently described</li> <li>• Participation rate: No data</li> </ul> | <ul style="list-style-type: none"> <li>• Vaccine uptake: No increase in completion rates in intervention group (17.2%) and control group (18.9%)</li> <li>• Other impact: Older, college degree holder and having lifetime partner complete 3 doses</li> <li>• Condition: cluster-randomized study (Intervention 180 vs. control 185)</li> <li>• Assessments: Baseline assessment was based on receiving first dose of vaccination. Subsequent assessments were based on when the second or third vaccination were received.</li> <li>• Vaccinated = 31+35=66</li> </ul> | <ul style="list-style-type: none"> <li>• Setting: 9 Planned Parenthood clinics, 1 hospital family planning clinic</li> <li>• Staff: Recruitment was done by trained research staff at 10 family planning clinics across 7 US states but those who delivered the intervention was not described.</li> </ul> | <ul style="list-style-type: none"> <li>• Medium: women selected preferred method (text, email, phone, private Facebook message, and standard mail as reminder)</li> <li>• Theory: No theory</li> <li>• Duration: Each participant received 4 messages reminder (over 32 week period)</li> <li>• Cost: No data</li> </ul>                                                | <ul style="list-style-type: none"> <li>• Institutionalization: Followed up the participants up to 32 weeks</li> </ul>                                                         |
| <b>Piedimonte S et al.</b> (2018)<br>USA/Canada | <ul style="list-style-type: none"> <li>• Design: RCT</li> <li>• Outcome: HPV vaccine uptake; also measured 3-dose completion rate</li> </ul> | <ul style="list-style-type: none"> <li>• Target Population: University students with mean 24.79 year</li> <li>• Behavior: Used targeted education and vaccination campaign</li> <li>• Sample: Phase I (n=56) and phase II (n=839)</li> <li>• Recruitment: Campaign was implemented on campuses.</li> </ul>                                                      | <ul style="list-style-type: none"> <li>• Vaccine uptake: 29 out of 56 were vaccinated in phase I and 64 of 151 were vaccinated. Additional 957 vaccinated</li> <li>• Other impact: Increased knowledge</li> <li>• Condition: McGill University (intervention group) and Concordia University (control)</li> <li>• Assessments: Baseline assessment in phase I and follow-up assessments not stated but implied that they were done at the time they received vaccines</li> <li>• Vaccinated =1,050</li> </ul>                                                            | <ul style="list-style-type: none"> <li>• Setting: Two university campuses.</li> <li>• Staff: 2 residents, 6 medical students</li> </ul>                                                                                                                                                                    | <ul style="list-style-type: none"> <li>• Medium: Social media advertising and mass emailing and posters on campus (did not specify which social media platforms – just social media advertising)</li> <li>• Theory: No theory</li> <li>• Duration: Not clearly stated</li> <li>• Cost: Total cost was not reported but the cost of vaccination was reported.</li> </ul> | <ul style="list-style-type: none"> <li>• Institutionalization: Reported 2- and 6-months follow-up assessment.</li> <li>• Program continued after the intervention.</li> </ul> |

| Title:                                                                                                                                                        |                                                                                                                          | <ul style="list-style-type: none"> <li>Unintended consequences were monitored and re-</li> </ul>                                                                                           |                                                                                                                                                                                                                                       | Group Based                                                                                                                                                               | Individual                                                                                                                                                                | Interactive technology                                                                                                                                                       | Theory |  |  |
|---------------------------------------------------------------------------------------------------------------------------------------------------------------|--------------------------------------------------------------------------------------------------------------------------|--------------------------------------------------------------------------------------------------------------------------------------------------------------------------------------------|---------------------------------------------------------------------------------------------------------------------------------------------------------------------------------------------------------------------------------------|---------------------------------------------------------------------------------------------------------------------------------------------------------------------------|---------------------------------------------------------------------------------------------------------------------------------------------------------------------------|------------------------------------------------------------------------------------------------------------------------------------------------------------------------------|--------|--|--|
| (Author, Journal, Year, Page):                                                                                                                                |                                                                                                                          | ported.                                                                                                                                                                                    |                                                                                                                                                                                                                                       | Comments:                                                                                                                                                                 |                                                                                                                                                                           |                                                                                                                                                                              |        |  |  |
| <b>Rand et al.</b><br><b>Outcome Measures:</b><br>(2015) USA knowledge and attitudes about prevention and on their human papillomavirus vaccination intention | <ul style="list-style-type: none"> <li>Design: RCT</li> <li>Outcomes: measure HPV vaccine dose 1; measure up-</li> </ul> | <ul style="list-style-type: none"> <li>Target Population: Parents of unvaccinated adolescents (11-16)</li> <li>Behavior: No record of HPV vaccination</li> <li>Sample: (n=3812)</li> </ul> | <ul style="list-style-type: none"> <li>Vaccine uptake: Intervention 16% vs. Control 13%</li> <li>Other impact: Not reported</li> <li>Condition: Randomized practices to intervention (n=1,893) and control group (n=1,919)</li> </ul> | <ul style="list-style-type: none"> <li>Setting: 29 pediatric clinics and 10 family medicine clinics in MCO network in up-state NY</li> <li>Staff: Managed care</li> </ul> | <ul style="list-style-type: none"> <li>Medium: Used text message reminder-recall system</li> <li>Theory: No theory</li> <li>Duration: Up to four text messages</li> </ul> | <ul style="list-style-type: none"> <li>Institutionalization: Measured first, second and third doses meaning assessments were done up to 12 months or more but not</li> </ul> |        |  |  |
| REACH                                                                                                                                                         |                                                                                                                          | Reported (Yes/No)                                                                                                                                                                          |                                                                                                                                                                                                                                       | Data                                                                                                                                                                      |                                                                                                                                                                           | Comments                                                                                                                                                                     |        |  |  |
| Described Target Population                                                                                                                                   | 2 and 3                                                                                                                  | pages were used to invite participants                                                                                                                                                     |                                                                                                                                                                                                                                       | <ul style="list-style-type: none"> <li>Vaccinated 303+249=552</li> </ul>                                                                                                  | throughout the intervention period. grammar delivered the intervention.                                                                                                   |                                                                                                                                                                              |        |  |  |
| Demographic information                                                                                                                                       | <ul style="list-style-type: none"> <li>Design: RCT</li> <li>Outcome:</li> </ul>                                          | Target Population: Parents of adolescents 11-17 years                                                                                                                                      | <ul style="list-style-type: none"> <li>Vaccine uptake: 48% of phone intervention vs. 40% of phone control and</li> </ul>                                                                                                              | <ul style="list-style-type: none"> <li>Setting: 3 urban primary care clinics in</li> </ul>                                                                                | <ul style="list-style-type: none"> <li>Medium: Used phone and text message reminders</li> </ul>                                                                           | <ul style="list-style-type: none"> <li>Institutionalization:</li> </ul>                                                                                                      |        |  |  |
| Method to identify target population                                                                                                                          | measure the time from en-                                                                                                | Behavior: Not completed 2 <sup>nd</sup> and 3 <sup>rd</sup> doses of vaccine.                                                                                                              | 49% of text intervention vs 30% of text control had received 2 HPV vaccine doses                                                                                                                                                      | Rochester, NY (pediatric, medicine pe-                                                                                                                                    | <ul style="list-style-type: none"> <li>Theory: No theory</li> <li>Duration: maximum of 3 re-</li> </ul>                                                                   | <ul style="list-style-type: none"> <li>intervention lasted 18 month period</li> </ul>                                                                                        |        |  |  |
| Recruitment Strategies                                                                                                                                        | attempt to re-                                                                                                           |                                                                                                                                                                                            |                                                                                                                                                                                                                                       | diatric, family medi-                                                                                                                                                     | minders sent for each dose                                                                                                                                                |                                                                                                                                                                              |        |  |  |
| Inclusion criteria                                                                                                                                            | cept of HPV                                                                                                              | <ul style="list-style-type: none"> <li>Sample: (n = 749)</li> </ul>                                                                                                                        | <ul style="list-style-type: none"> <li>Other impact: text message reminders</li> </ul>                                                                                                                                                | cine).                                                                                                                                                                    | one week apart                                                                                                                                                            |                                                                                                                                                                              |        |  |  |
| Exclusion criteria                                                                                                                                            | doses 2 and 3 (for adoles-                                                                                               | <ul style="list-style-type: none"> <li>Recruitment: Method not</li> </ul>                                                                                                                  | and phone message reminders proved to be effective for the adolescents                                                                                                                                                                | <ul style="list-style-type: none"> <li>Staff: Not data</li> </ul>                                                                                                         | <ul style="list-style-type: none"> <li>Cost: No data</li> </ul>                                                                                                           |                                                                                                                                                                              |        |  |  |
| Target population denominator                                                                                                                                 | cents who had                                                                                                            | clearly stated but participants were recruited from                                                                                                                                        | <ul style="list-style-type: none"> <li>Condition: two parallel, two arm RCTs</li> </ul>                                                                                                                                               |                                                                                                                                                                           |                                                                                                                                                                           |                                                                                                                                                                              |        |  |  |
| Sample size                                                                                                                                                   | already started                                                                                                          | clinics                                                                                                                                                                                    | (phone reminder (n=178) vs standard                                                                                                                                                                                                   |                                                                                                                                                                           |                                                                                                                                                                           |                                                                                                                                                                              |        |  |  |
| Participation rate (vaccine series)                                                                                                                           |                                                                                                                          | <ul style="list-style-type: none"> <li>Used intent-to-treat analy-</li> </ul>                                                                                                              | sis of care (n=180), text reminder (n=191                                                                                                                                                                                             |                                                                                                                                                                           |                                                                                                                                                                           |                                                                                                                                                                              |        |  |  |
| Characteristics of both participation and non-participation                                                                                                   |                                                                                                                          |                                                                                                                                                                                            | vs standard of care n=200)                                                                                                                                                                                                            |                                                                                                                                                                           |                                                                                                                                                                           |                                                                                                                                                                              |        |  |  |
| Cost of recruitment                                                                                                                                           |                                                                                                                          |                                                                                                                                                                                            | <ul style="list-style-type: none"> <li>Assessments: vaccine dose uptake measured during and immediately after intervention</li> </ul>                                                                                                 |                                                                                                                                                                           |                                                                                                                                                                           |                                                                                                                                                                              |        |  |  |
|                                                                                                                                                               |                                                                                                                          |                                                                                                                                                                                            | <ul style="list-style-type: none"> <li>Vaccinated 85+72+94+60=311</li> </ul>                                                                                                                                                          |                                                                                                                                                                           |                                                                                                                                                                           |                                                                                                                                                                              |        |  |  |

| EFFICACY/EFFECTIVENESS                                                                                                                      |                                                      | Design                                                                                                                                                                                                                                                                                       |                                                                                                                                                                               | Conditions |                                                                                                                      |  |                                                                                                                                                                                                                                |                                                                                                                                        | ization: |
|---------------------------------------------------------------------------------------------------------------------------------------------|------------------------------------------------------|----------------------------------------------------------------------------------------------------------------------------------------------------------------------------------------------------------------------------------------------------------------------------------------------|-------------------------------------------------------------------------------------------------------------------------------------------------------------------------------|------------|----------------------------------------------------------------------------------------------------------------------|--|--------------------------------------------------------------------------------------------------------------------------------------------------------------------------------------------------------------------------------|----------------------------------------------------------------------------------------------------------------------------------------|----------|
| al. (2016) USA                                                                                                                              | • Outcomes<br>Primary: HPV vaccine series completion | students between 18 – 26 years                                                                                                                                                                                                                                                               | HPV doses 2 and 3 not significantly different (53% for intervention grp vs 52% for control grp for HPV dose 2 and 34% for intervention grp vs 32% for control grp for dose 3) |            | rural university in NC                                                                                               |  | minders and educational messages. Control participants received standard of care (paper card with next appt date).                                                                                                             | • baseline paper survey administered at enrollment, electronic f/u survey via Qualtrics administered 7 months after HPV dose 1 receipt |          |
| Efficacy, Effectiveness, Translational?                                                                                                     |                                                      | • Behavior: had received first HPV vaccine dose                                                                                                                                                                                                                                              |                                                                                                                                                                               |            | • Staff: student center pharmacist approached and consented students into study, also administered HPV vaccine doses |  |                                                                                                                                                                                                                                |                                                                                                                                        |          |
| Measure of primary outcome with or w/o comparison to a public health goal (e.g. HP 2020 goals, exercise 30 min/day; eat 5 Fruits & Veggies) |                                                      | • Sample: (n=264)<br>• Recruitment: Participants also recruited through special health education events held by study staff.<br>• Participation rate: all participants completed baseline survey, 34% of intervention group completion f/u survey, 39% of control group completed f/u survey | • Other impact: intervention group had significantly higher mean knowledge scores<br>• Condition: Intervention (n=130) vs control (n = 134)                                   |            | • Location of intervention was well described                                                                        |  | • Theory: No theory<br>• Duration: Intervention group received 7 electronic messages across 7 months<br>• Cost: Total cost not reported but each participant received \$10 iTunes gift card and a chance to win an Apple iPad. |                                                                                                                                        |          |
| Results (at shortest assessment)                                                                                                            |                                                      |                                                                                                                                                                                                                                                                                              | • Assessments: Baseline assessments and 7 months post intervention assessment                                                                                                 |            |                                                                                                                      |  |                                                                                                                                                                                                                                |                                                                                                                                        |          |
| Intent-to-treat or present at FU (circle one)                                                                                               |                                                      |                                                                                                                                                                                                                                                                                              | • Vaccinate 69+70=139                                                                                                                                                         |            |                                                                                                                      |  |                                                                                                                                                                                                                                |                                                                                                                                        |          |
| Imputation procedures (specify)                                                                                                             |                                                      |                                                                                                                                                                                                                                                                                              |                                                                                                                                                                               |            |                                                                                                                      |  |                                                                                                                                                                                                                                |                                                                                                                                        |          |
| Richman et al. (2019) USA                                                                                                                   | • Design: RCT                                        | • Target Population: Parent child dyads (child ages 9 - 17 years)                                                                                                                                                                                                                            | • Vaccine uptake: Completion rates in intervention 65% and control group 65% for HPV dose 2 and HPV dose 3 (35% vs. 30% respectively)                                         |            | • Setting: 2 community clinics (1 in Pitt county, 1 in Greene county)                                                |  | • Medium: Used text/email                                                                                                                                                                                                      | • Institutional                                                                                                                        | ization: |
| Quality of life measure                                                                                                                     |                                                      |                                                                                                                                                                                                                                                                                              |                                                                                                                                                                               |            |                                                                                                                      |  |                                                                                                                                                                                                                                |                                                                                                                                        |          |
| Measure of unintended consequences (negative) & Results                                                                                     | HPV vaccine uptake and completion                    | • Behavior: Never vaccinated<br>• Sample: (n = 257)                                                                                                                                                                                                                                          | • Other impact: intervention not successful at increasing HPV 3                                                                                                               |            | • Staff: study staff trained in basic study recruitment (Pitt county clinic)                                         |  |                                                                                                                                                                                                                                | No data reported                                                                                                                       |          |
| Measure of robustness across subgroups (e.g. moderation analyses)                                                                           |                                                      | • Recruitment: Participants were recruited when they were at clinic to receive first dose vaccine                                                                                                                                                                                            | • Condition: Parent child dyads randomized to intervention (n=129) vs parent child dyads randomized to control (n=128)                                                        |            | • doctors/nurses who administer HPV vaccine                                                                          |  | • Duration: Intervention group received 7 electronic messages                                                                                                                                                                  |                                                                                                                                        |          |
| Measure of short-term attrition (%) and differential rates by patient characteristics or treatment condition                                |                                                      |                                                                                                                                                                                                                                                                                              |                                                                                                                                                                               |            |                                                                                                                      |  | • Cost: Total cost not reported but each participant                                                                                                                                                                           |                                                                                                                                        |          |
|                                                                                                                                             |                                                      |                                                                                                                                                                                                                                                                                              |                                                                                                                                                                               |            |                                                                                                                      |  |                                                                                                                                                                                                                                |                                                                                                                                        |          |



| Cost effectiveness                                          |                          |                                                                                                             |                                                                                                                                                                                       | • Assessments: baseline survey administered at enrollment; electronic survey | cines trained in recruitment (Greene)                                                                                      | received \$15 Wal-Mart gift card                           |  |  |
|-------------------------------------------------------------|--------------------------|-------------------------------------------------------------------------------------------------------------|---------------------------------------------------------------------------------------------------------------------------------------------------------------------------------------|------------------------------------------------------------------------------|----------------------------------------------------------------------------------------------------------------------------|------------------------------------------------------------|--|--|
| ADOPTION - Setting Level                                    |                          |                                                                                                             | Reported (Yes/No)                                                                                                                                                                     | Data                                                                         |                                                                                                                            | Comments                                                   |  |  |
| Description of intervention                                 | Description of location  | Target Population: Students and parents of adolescents of year 7 students (7 <sup>th</sup> grade students). | • Vaccine uptake: 85.71% of students in control, 88.35% in motivational arm, and 89.00% of students in self-regulatory arm received any dose of HPV vaccine at the third school visit | • Setting: Schools                                                           | • Medium: Used text messages (groups were motivational SMS vs self-regulatory SMS vs no SMS at all)                        | • Institutionalization:                                    |  |  |
| (2019) Description of staff who delivered HPV vaccine       | • Outcome: uptake of any | Behavior: child had not yet completed HPV vaccine                                                           | • Other impact: Extended follow-up effect was noticed.                                                                                                                                | • Staff: No data                                                             | • Setting participation rate: 7 out of 12 local government immunization providers identified by research team participated | Extended f/u period for students who missed 3rd dose visit |  |  |
| Method to identify target delivery agent                    |                          | series                                                                                                      | • Intent to treat analysis                                                                                                                                                            |                                                                              | • Theory: motivational strategy based on HBM                                                                               |                                                            |  |  |
| Level of expertise of delivery agent                        |                          | • Sample: (n=4386)                                                                                          | • Condition: RCT: Motivational Short Message Service (SMS) n=1442 vs. self-regulatory SMS n=1418 vs. no SMS n=1,526                                                                   |                                                                              | • Duration: 1 reminder SMS sent 2 working days before HPV vaccine visit                                                    |                                                            |  |  |
| Inclusion/exclusion criteria of settings or interventionist |                          | • Recruitment: Recruited parents using a list from the selected schools.                                    |                                                                                                                                                                                       | • 31 out of 108 schools participated                                         | • Cost: No data                                                                                                            |                                                            |  |  |
| Rate (#participating settings/total settings)               |                          | • Used intent-to-treat analysis                                                                             |                                                                                                                                                                                       |                                                                              |                                                                                                                            |                                                            |  |  |
| Organizational spread (how far into an organization)        |                          |                                                                                                             | • Assessments: study completion rates measured at end of intervention (Dec 2016) and end of extended f/u period (Jan 2017)                                                            |                                                                              |                                                                                                                            |                                                            |  |  |
| Characteristics of adoption/non-adoption                    |                          |                                                                                                             | • 1308+1274+1262=3,844                                                                                                                                                                |                                                                              |                                                                                                                            |                                                            |  |  |
| Measures of cost of adoption                                |                          |                                                                                                             |                                                                                                                                                                                       |                                                                              |                                                                                                                            |                                                            |  |  |
| Dissemination beyond originally planned                     |                          |                                                                                                             |                                                                                                                                                                                       |                                                                              |                                                                                                                            |                                                            |  |  |
| IMPLEMENTATION                                              |                          |                                                                                                             | Reported (Yes/No)                                                                                                                                                                     | Data                                                                         |                                                                                                                            | Comments                                                   |  |  |
| Theories                                                    |                          |                                                                                                             |                                                                                                                                                                                       |                                                                              |                                                                                                                            |                                                            |  |  |

|                                                                                                                                 |                          |             |                 |
|---------------------------------------------------------------------------------------------------------------------------------|--------------------------|-------------|-----------------|
| Technology/Social media                                                                                                         |                          |             |                 |
| Intervention number of contacts                                                                                                 |                          |             |                 |
| Timing of contacts                                                                                                              |                          |             |                 |
| Duration of contacts                                                                                                            |                          |             |                 |
| Extent protocol delivered as intended (%)                                                                                       |                          |             |                 |
| Participant attendance/completion rates                                                                                         |                          |             |                 |
| Measures of cost                                                                                                                |                          |             |                 |
| <b>MAINTENANCE</b>                                                                                                              | <b>Reported (Yes/No)</b> | <b>Data</b> | <b>Comments</b> |
| Was individual behavior assessed at some duration following the completion of the intervention?<br>(give duration of follow-up) |                          |             |                 |
| Attrition                                                                                                                       |                          |             |                 |
| Is the program still in place?                                                                                                  |                          |             |                 |
| If no: reason for discontinuation                                                                                               |                          |             |                 |
| If yes: was the program modified?<br>Specify                                                                                    |                          |             |                 |
| Was the program institutionalized?                                                                                              |                          |             |                 |

|                                                                                                                                          |    |  |  |
|------------------------------------------------------------------------------------------------------------------------------------------|----|--|--|
| Measure of primary outcome (with or w/o comparison to a public health goal) at $\geq$ 6mo follow-up after final intervention contact     |    |  |  |
| Measure of broader outcomes or use of multiple criteria at follow- up (e.g., measure of QoL or potential negative outcome) at follow- up |    |  |  |
| Robustness data - something about subgroup effects over the long- term                                                                   |    |  |  |
| Measure of long-term attrition (%) and differential rates by patient characteristics or treatment condition                              | No |  |  |
